# Supplementary material for: CircRNA CDR1as promotes hepatoblastoma proliferation and stemness by acting as a miR-7-5p sponge to upregulate KLF4 expression
Source: publisher site journal article supplement (doi:10.18632/aging.103748), 2020-10-14
Supplement: Supplementary file [file aging-v12i19-103748-supplementary-material-SD1.pdf]

## SUPPLEMENTARY FIGURE

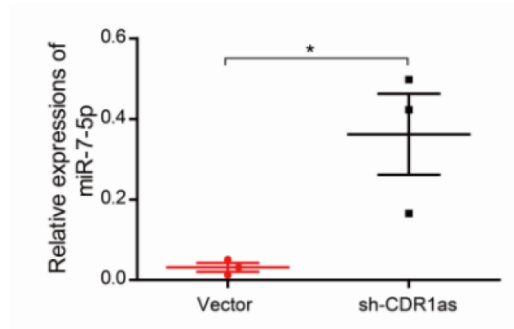

Supplementary Figure 1. qRT-PCR analysis of miR-7-5p in the tumor tissues of the sh-CDR1as group.
