# Supplementary material for: CircRNA CDR1as promotes hepatoblastoma proliferation and stemness by acting as a miR-7-5p sponge to upregulate KLF4 expression
Source: publisher site journal article supplement (doi:10.18632/aging.103748), 2020-10-14
Supplement: Supplementary file [file aging-v12i19-103748-supplementary-material-SD2.pdf]

**SUPPLEMENTARY TABLES**

**Supplementary Table 1. The primers used in this study are listed as follows.**

| <b>Primers</b>         | <b>Sequence (5'-3')</b>                      |
|------------------------|----------------------------------------------|
| GAPDH Forward          | GTCTCCTCTGACTTCAACAGCG                       |
| GAPDH Reverse          | ACCACCCTGTTGCTGTAGCCAA                       |
| CircRNA CDR1as Forward | CAGTCTCCATCAACTGGCTCA                        |
| CircRNA CDR1as Reverse | ACACAGGTGCCATCGGAAAC                         |
| CDR1 Forward           | CGGATTCCTGGAAGACCTGGA                        |
| CDR1 Reverse           | TCCGTGTCTTCCAGCAAGTCCA                       |
| KLF4 Forward           | CATCTCAAGGCACACCTGCGAA                       |
| KLF4 Reverse           | TCGGTCGCATTTTTGGCACTGG                       |
| SOX2 Forward           | GCTACAGCATGATGCAGGACCA                       |
| SOX2 Reverse           | TCTGCGAGCTGGTCATGGAGTT                       |
| OCT4 Forward           | CCTGAAGCAGAAGAGGATCACC                       |
| OCT4 Reverse           | AAAGCGGCAGATGGTCGTTTGG                       |
| NANGO Forward          | CTCCAACATCCTGAACCTCAGC                       |
| NANGO Reverse          | CGTCACACCATTGCTATTCTTCG                      |
| CD133 Forward          | CACTACCAAGGACAAGGCGTTC                       |
| CD133 Reverse          | CAACGCCTCTTTGGTCTCCTTG                       |
| CD24 Forward           | CACGCAGATTTATTCCAGTGAAAC                     |
| CD24 Reverse           | GACCACGAAGAGACTGGCTGTT                       |
| CD13 Forward           | GCTGTTTGACGCCATCTCCTAC                       |
| CD13 Reverse           | GTTCTGGTAGGCAAAGGTGTGG                       |
| U6 Forward             | CCGTATGACCTCCTCCACAGA                        |
| U6 Reverse             | TCTGTCCACCTCTGAAACCAGG                       |
| miR-7-5p Forward       | ACACTCCAGCTGGGTGGAAGACTAGTAGTTTT             |
| miR-7-5p Reverse       | CTCAACTGGTGTCGTGGAGTCGGCAATTCAGTTGAGAACAACAA |
| miR-1246 Forward       | ACACTCCAGCTGGGAATGGATTTTTGG                  |
| miR-1246 Reverse       | CTCAACTGGTGTCGTGGAGTCGGCAATTCAGTTGAGCCTGCTCC |
| miR-1270 Forward       | ACACTCCAGCTGGGCTGGAGATATGGAAGAG              |
| miR-1270 Reverse       | CTCAACTGGTGTCGTGGAGTCGGCAATTCAGTTGAGACACAGCT |
| miR-1277-3p Forward    | ACACTCCAGCTGGGTACGTAGATATATATG               |
| miR-1277-3p Reverse    | CTCAACTGGTGTCGTGGAGTCGGCAATTCAGTTGAGAAAATACA |
| miR-1290 Forward       | ACACTCCAGCTGGGTGGATTTTTGGAT                  |
| miR-1290 Reverse       | CTCAACTGGTGTCGTGGAGTCGGCAATTCAGTTGAGTCCCTGAT |
| miR-1299 Forward       | ACACTCCAGCTGGGTTCTGGAATTCTGTGT               |
| miR-1299 Reverse       | CTCAACTGGTGTCGTGGAGTCGGCAATTCAGTTGAGTCCCTCAC |
| miR-490-5p Forward     | ACACTCCAGCTGGGCCATGGATCTCCAG                 |
| miR-490-5p Reverse     | CTCAACTGGTGTCGTGGAGTCGGCAATTCAGTTGAGACCCACCT |
| miR-576-3p Forward     | ACACTCCAGCTGGGAAGATGTGGAAAAATT               |
| miR-576-3p Reverse     | CTCAACTGGTGTCGTGGAGTCGGCAATTCAGTTGAGGATTCCAA |
| miR-619-3p Forward     | ACACTCCAGCTGGGGACCTGGACATGTTTGTG             |
| miR-619-3p Reverse     | CTCAACTGGTGTCGTGGAGTCGGCAATTCAGTTGAGACTGGGCA |
| miR-620 Forward        | ACACTCCAGCTGGGATGGAGATAGATAT                 |
| miR-620 Reverse        | CTCAACTGGTGTCGTGGAGTCGGCAATTCAGTTGAGATTTCTAT |
| miR-671-5p Forward     | CTCAACTGGTGTCGTGGAGTCGGCAATTCAGTTGAGCTCCAGCC |
| miR-671-5p Reverse     | ACACTCCAGCTGGGAGGAAGCCCTGGAGGGG              |
| miR-7-5p Forward       | CTCAACTGGTGTCGTGGAGTCGGCAATTCAGTTGAGAACAACAA |
| miR-7-5p Reverse       | ACACTCCAGCTGGGTGGAAGACTAGTGATTTT             |
| miR-944 Forward        | CTCAACTGGTGTCGTGGAGTCGGCAATTCAGTTGAGCTCATCCG |
| miR-944 Reverse        | ACACTCCAGCTGGGAATTTATTGTACATCG               |
| 18S rRNA Forward       | GGAGTATGGTTGCAAAGCTGA                        |
| 18S rRNA Reverse       | TCCTGCTTTGGGGTTCGATT                         |

**Supplementary Table 2. The oligonucleotides transfected in this study are listed as follows.**

| <b>Oligonucleotides</b>   | <b>Sequence (5'-3')</b>  |
|---------------------------|--------------------------|
| NC sense                  | UUCUCCGAACGUGUCACGUTT    |
| NC antisense              | ACGUGACACGUUCGGAGAATT    |
| CDR1as si-1 sense         | CUGCAAUAUCCAGGGUUUCTT    |
| CDR1as si-1 antisense     | GAAACCCUGGAUAUUGCAGTT    |
| CDR1as si-2 sense         | AUCCAGGGUUUCCGAUGGCTT    |
| CDR1as si-2 antisense     | GCCAUCGGAAACCCUGGAUTT    |
| miR-7-5p mimics sense     | UGGAAGACUAGUGAUUUUGUUGUU |
| miR-7-5p mimics antisense | CAACAAAAUCACUAGUCUCCA    |
| KLF4 si-1 sense           | CCGAGGAGUUAACGAUCUTT     |
| KLF4 si-1 antisense       | AGAUCGUUGAACUCCUCGGTT    |
| KLF4 si-2 sense           | CCUUACACAUGAAGAGGCATT    |
| KLF4 si-2 antisense       | UGCCUCUUAUGUGUAAGGTT     |
| MicroRNA inhibitor NC     | CAGUACUUUUGUGUAGUACAA    |
| miR-7-5p inhibitor        | AACAACAAAAUCACUAGUCUCCA  |

**Supplementary Table 3. The probes used in this study are listed as follows.**

|                              | <b>Sequence (5'-3')</b>   |
|------------------------------|---------------------------|
| <b>FISH Probes</b>           |                           |
| Cy3-U6                       | TTTGCGTGTCATCCTTGCG       |
| Cy3-18S                      | CTTCCTTGGATGTGGTAGCCGTTTC |
| Cy3-CDR1as                   | CCATCGGAAACCCTGGATAT      |
| Cy5-miR-7-5p                 | AACAACAAAATCACTAGTCTTCCA  |
| <b>Biotin-coupled probes</b> |                           |
| Biotin-NC                    | GGCACCGTACGTCAACTTAA      |
| Biotin-CDR1as                | CCATCGGAAACCCTGGATAT      |
| Biotin-miR-7-5p              | UGGAAGACUAGUGAUUUUGUUGUU  |
